# Supplementary material for: Insights into the ligand effects of rhodium catalysts toward reductive carbonylation of methanol to ethanol
Source: Royal Society of Chemistry journal article supplement (doi:10.1039/c7ra10739k), 2017-01-01
Supplement: c7ra10739k1.pdf [file c7ra10739k1.pdf]

## Supplementary Information

### Insights into the ligand effects of rhodium catalysts toward reductive carbonylation of methanol to ethanol

Yingzan Chen, Dianhua Liu\*, Yi Yu,

State Key Laboratory of Chemical Engineering, East China University of Science and Technology, 130 Meilong Road, Shanghai 200237, China

#### Table of Contents

|                                                                                                                                                                                                                                                                                                                     |     |
|---------------------------------------------------------------------------------------------------------------------------------------------------------------------------------------------------------------------------------------------------------------------------------------------------------------------|-----|
| Table S1 Reaction conditions and reductive carbonylation performances of used Co-based catalysts                                                                                                                                                                                                                    | S2  |
| Table S2 Crystallographic data for the X-ray diffraction analysis of $[\text{Rh}_2(\mu\text{-I})(\mu\text{-CO})(\text{CO})_2(\text{dppm})_2]^+$ , $[\text{Rh}(\text{COCH}_3)\text{I}_2(\text{dppe})]$ , $[\text{Rh}(\text{COCH}_3)\text{I}_2(\text{dppp})]$ and $[\text{Rh}(\text{COCH}_3)\text{I}_2(\text{dppb})]$ | S3  |
| Table S3 Selected interatomic distances (Å) and bond angles (deg) for $[\text{Rh}(\text{COCH}_3)\text{I}_2(\text{dppp})]$ in different temperature                                                                                                                                                                  | S4  |
| Table S4 The catalytic performance of various Rh-based catalyst in the reductive carbonylation of methanol                                                                                                                                                                                                          | S4  |
| Fig. S1 Catalytic cycle for methanol carbonylation and reduction carbonylation catalyzed by Rh(diphosphine)-based catalysts.                                                                                                                                                                                        | S5  |
| Fig. S2. Molecular structures of complex $[\text{Rh}(\text{COCH}_3)\text{I}_2(\text{dppm})]$ .                                                                                                                                                                                                                      | S5  |
| Characterizing Data                                                                                                                                                                                                                                                                                                 | S6  |
| Fig. S3 $^1\text{H}$ and $^{31}\text{P}$ NMR spectra of $[\text{Rh}_2(\mu\text{-I})(\mu\text{-CO})(\text{CO})_2(\text{dppm})_2]^+$                                                                                                                                                                                  | S7  |
| Fig. S4 $^1\text{H}$ and $^{31}\text{P}$ NMR spectra of $[\text{Rh}(\text{COCH}_3)\text{I}_2(\text{dppe})]$                                                                                                                                                                                                         | S8  |
| Fig. S5 $^1\text{H}$ and $^{31}\text{P}$ NMR spectra of $[\text{Rh}(\text{COCH}_3)\text{I}_2(\text{dppp})]$                                                                                                                                                                                                         | S9  |
| Fig. S6 $^1\text{H}$ and $^{31}\text{P}$ NMR spectra of $[\text{Rh}(\text{COCH}_3)\text{I}_2(\text{dppb})]$                                                                                                                                                                                                         | S10 |
| References                                                                                                                                                                                                                                                                                                          | S11 |

**Table S1**

Reaction conditions and reductive carbonylation performances of used Co-based catalysts

| reference                      | S1   | S2                | S3                  | S4               | S4    | S4               | S5               |
|--------------------------------|------|-------------------|---------------------|------------------|-------|------------------|------------------|
| catalyst system                | Co   | Co                | Co                  | Co               | Co    | Co               | Co-Ru            |
| promotor                       | none | none              | I <sub>2</sub>      | none             | HI    | HI               | I <sub>2</sub>   |
| ligand                         | none | PBu <sub>3</sub>  | n-Bu <sub>3</sub> P | PPh <sub>3</sub> | none  | PPh <sub>3</sub> | PPh <sub>3</sub> |
| reaction pressure, (MPa)       | 34   | 19.6 <sup>a</sup> | 13.5 <sup>a</sup>   | 30               | 30    | 30               | 27               |
| H <sub>2</sub> /CO molar ratio | 0.9  | 1                 | 2                   | 1                | 1     | 1                | 1.5              |
| temperature, (°C)              | 190  | 230               | 195                 | 200              | 200   | 190              | 170              |
| solvent                        | none | benzene           | 1,4-dioxane         | none             | none  | none             | toluene          |
| reaction time                  | 2    | 4.5 <sup>b</sup>  | 4.33                | 2                | 2     | 2.5              | 6                |
| methanol conversion            | 30   | 37.1              | 52.2                | 7.4              | 69    | 47               | —                |
| molar selectivity, (%)         |      |                   |                     |                  |       |                  |                  |
| dimethyl ether                 | 11.3 | —                 | 0.7                 | } 2.3            | } 6.8 | } 2.9            | 7                |
| methyl ethyl ether             | 0    | 0.9               | 0.8                 |                  |       |                  | 0                |
| diethyl ether                  | 1.0  | —                 | —                   |                  |       |                  | 13               |
| acetaldehyde                   | 2.0  | —                 | 1.3                 | 0                |       | 3.2              | 0                |
| dimethyl acetal                | 5.2  | —                 | 3.7                 | 42               | 41    | 13               | —                |
| methyl acetate                 | 17.4 | —                 | 3.4                 | } 3.4            | 20    | 16               | 18               |
| ethyl acetate                  | —    | —                 | 0.7                 |                  |       |                  | 0                |
| ethanol                        | 37.5 | 77.6              | 74.4                | 1.2              | 5.9   | 9.2              | 58               |

<sup>a</sup> initial pressure. <sup>b</sup> activation time 3.0 h, reaction time 1.5h.

**Table S2**

Crystallographic Data for the X-ray Diffraction Analysis of  $[\text{Rh}_2(\mu\text{-I})(\mu\text{-CO})(\text{CO})_2(\text{dppm})_2]^+$ ,  $[\text{Rh}(\text{COCH}_3)_2(\text{dppe})]$ ,  $[\text{Rh}(\text{COCH}_3)_2(\text{dppp})]$  and  $[\text{Rh}(\text{COCH}_3)_2(\text{dppb})]$

|                                      | $[\text{Rh}_2(\mu\text{-I})(\mu\text{-CO})(\text{CO})_2(\text{dppm})_2]^+$ | $[\text{Rh}(\text{COCH}_3)_2(\text{dppe})]$                | $[\text{Rh}(\text{COCH}_3)_2(\text{dppp})]$                | $[\text{Rh}(\text{COCH}_3)_2(\text{dppb})]$                |
|--------------------------------------|----------------------------------------------------------------------------|------------------------------------------------------------|------------------------------------------------------------|------------------------------------------------------------|
| empirical formula                    | $\text{C}_{53}\text{H}_{44}\text{IO}_3\text{P}_4\text{Rh}_2$               | $\text{C}_{28}\text{H}_{27}\text{I}_2\text{OP}_2\text{Rh}$ | $\text{C}_{29}\text{H}_{29}\text{I}_2\text{OP}_2\text{Rh}$ | $\text{C}_{30}\text{H}_{31}\text{I}_2\text{OP}_2\text{Rh}$ |
| CCDC Number                          | 1527246                                                                    | 1527365                                                    | 1527366                                                    | 1527367                                                    |
| cryst dims, $\text{mm}^3$            | $0.176 \times 0.143 \times 0.112$                                          | $0.165 \times 0.144 \times 0.112$                          | $0.25 \times 0.2 \times 0.15$                              | $0.187 \times 0.156 \times 0.112$                          |
| temp, K                              | 133(2)                                                                     | 133(2)                                                     | 130                                                        | 133(2)                                                     |
| cryst syst                           | Triclinic                                                                  | Triclinic                                                  | Monoclinic                                                 | Orthorhombic                                               |
| space group                          | P-1                                                                        | P-1                                                        | P 21/n 1                                                   | Pna2 <sub>1</sub>                                          |
| a, Å                                 | 14.3031(12)                                                                | 9.0991(9)                                                  | 10.2587(6)                                                 | 22.8849(16)                                                |
| b, Å                                 | 18.7654(16)                                                                | 10.2694(10)                                                | 10.1737(6)                                                 | 9.1204(6)                                                  |
| c, Å                                 | 20.9726(17)                                                                | 14.8252(14)                                                | 27.0921(16)                                                | 14.2625(10)                                                |
| $\alpha$ , deg                       | 81.030(2)                                                                  | 92.239(2)                                                  | 90                                                         | 90                                                         |
| $\beta$ , deg                        | 84.861(2)                                                                  | 94.083(2)                                                  | 95.0890(10)                                                | 90                                                         |
| $\gamma$ , deg                       | 79.291(2)                                                                  | 99.430(2)                                                  | 90                                                         | 90                                                         |
| V, Å <sup>3</sup>                    | 5452.8(8)                                                                  | 1361.3(2)                                                  | 2816.4(3)                                                  | 2976.9(4)                                                  |
| Z                                    | 4                                                                          | 2                                                          | 4                                                          | 4                                                          |
| fw, amu                              | 1185.48                                                                    | 798.14                                                     | 812.17                                                     | 826.20                                                     |
| calcd density, $\text{g/cm}^3$       | 1.444                                                                      | 1.947                                                      | 1.915                                                      | 1.843                                                      |
| F(000)                               | 2356                                                                       | 768                                                        | 1568                                                       | 1600                                                       |
| final R indices [ $I > 2\sigma(I)$ ] | R1 = 0.0530,<br>wR2 = 0.1060                                               | R1 = 0.0298,<br>wR2 = 0.0539                               | R1 = 0.0270,<br>wR2 = 0.0543                               | R1 = 0.0251,<br>wR2 = 0.0438                               |
| R indices (all data)                 | R1 = 0.0932,<br>wR2 = 0.1189                                               | R1 = 0.0425,<br>wR2 = 0.0580                               | R1 = 0.0341,<br>wR2 = 0.0567                               | R1 = 0.0296,<br>wR2 = 0.0455                               |
| GOF                                  | 0.894                                                                      | 0.984                                                      | 1.045                                                      | 1.026                                                      |
| $\theta$ , deg                       | 25.242                                                                     | 25.242                                                     | 25.242                                                     | 25.242                                                     |
| scan width, Å                        | 0.71073                                                                    | 0.71073                                                    | 0.71073                                                    | 0.71073                                                    |
| index ranges                         | -17 ≤ h ≤ 16,<br>-22 ≤ k ≤ 21,<br>-25 ≤ l ≤ 25                             | -8 ≤ h ≤ 11,<br>-12 ≤ k ≤ 12,<br>-18 ≤ l ≤ 18              | -11 ≤ h ≤ 14,<br>-14 ≤ k ≤ 14,<br>-38 ≤ l ≤ 33             | -25 ≤ h ≤ 28,<br>-11 ≤ k ≤ 10,<br>-17 ≤ l ≤ 14             |

**Table S3**

Selected interatomic distances (Å) and bond angles (deg) for [Rh(dppp)(COCH<sub>3</sub>)I<sub>2</sub>] in different temperature.

|                    | [Rh(dppp)(COCH <sub>3</sub> )I <sub>2</sub> ] |           |
|--------------------|-----------------------------------------------|-----------|
| CCDC Number        | 1014689                                       | 1304156   |
| Temp, K            | 110                                           | 295       |
| Solvent            | methylene chloride                            | methanol  |
| P1-Rh-P2, deg      | 90.96(3)                                      | 90.49(5)  |
| Rh-C(O)-C(H3), deg | 112.7(2)                                      | 113.1(4)  |
| I1-Rh-I2, deg      | 88.696(11)                                    | 89.15(2)  |
| Rh-C(O), Å         | 1.979(3)                                      | 1.981(6)  |
| Rh-I1, Å           | 2.6975(3)                                     | 2.6768(5) |
| Rh-I2, Å           | 2.6975(3)                                     | 2.7263(5) |
| Rh-P1, Å           | 2.2863(5)                                     | 2.276(1)  |
| Rh-P2, Å           | 2.2863(5)                                     | 2.299(1)  |
| Ref                | s6                                            | s7        |

**Table S4**

The catalytic performance of various Rh-based catalyst in the reductive carbonylation of methanol. Results are expressed as mean ± standard error <sup>a</sup>.

| Catalyst Composition    | Carbonylates product distribution (mol%) <sup>b</sup> |          |                   |         |         |          |         |
|-------------------------|-------------------------------------------------------|----------|-------------------|---------|---------|----------|---------|
|                         | EtOH                                                  | MeOEt    | Et <sub>2</sub> O | DMAc    | EtOAc   | MeOAc    | AcOH    |
| Rh-based catalyst       | 15.6±0.3                                              | 8.0±0.1  | 0.0±0             | 1.1±0.1 | 2.5±0.1 | 72.3±1.1 | 0.5±0.1 |
| Rh(dppm)-based catalyst | 22.7±0.6                                              | 0.0±0    | 0.0±0             | 2.6±0.1 | 4.7±0.2 | 63.5±1.1 | 6.5±0.2 |
| Rh(dppe)-based catalyst | 39.6±1.1                                              | 12.1±0.3 | 0.7±0.1           | 1.6±0.1 | 4.3±0.1 | 41.7±1.1 | 0.0±0   |
| Rh(dppp)-based catalyst | 59.0±1.1                                              | 15.9±0.3 | 1.2±0.1           | 2.3±0.1 | 3.4±0.1 | 17.7±0.6 | 0.5±0.1 |
| Rh(dppb)-based catalyst | 4.3±0.1                                               | 4.9±0.2  | 0.0±0             | 1.3±0.1 | 1.9±0.1 | 87.6±1.1 | 0.0±0   |

<sup>a</sup> Error was calculated from three experiments.

<sup>b</sup> The product distribution excluded dimethyl ether because it was formed from the reaction between methanol and methyl iodide <sup>s8</sup>. EtOH = ethanol, MeOEt = ethyl methyl ether, Et<sub>2</sub>O = diethyl ether, DMAc = dimethyl acetal, EtOAc = ethyl acetate, MeOAc = methyl acetate, AcOH = acetic acid.

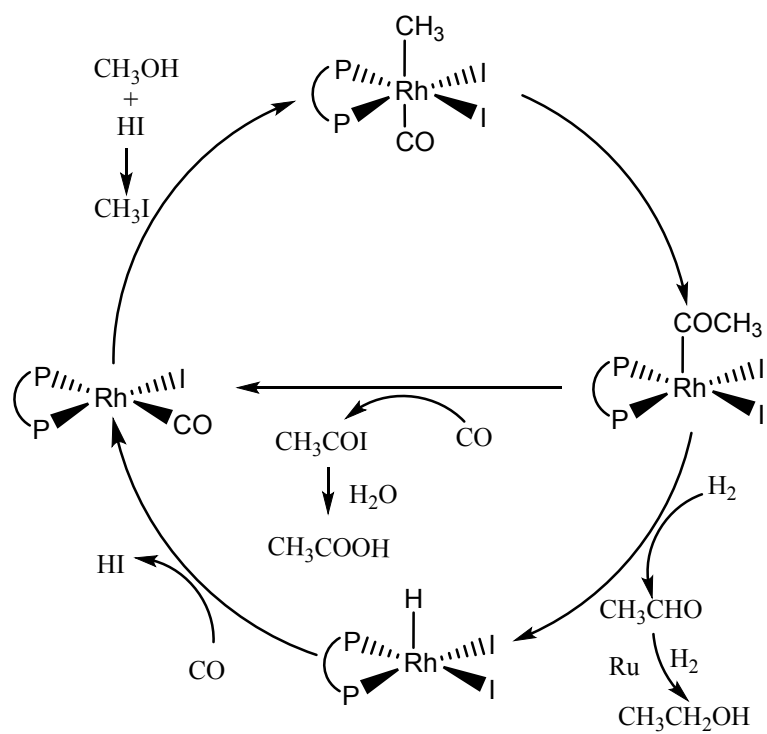

Fig. S1 Catalytic cycle for methanol carbonylation and reduction carbonylation catalyzed by Rh(diphosphine)-based catalysts.

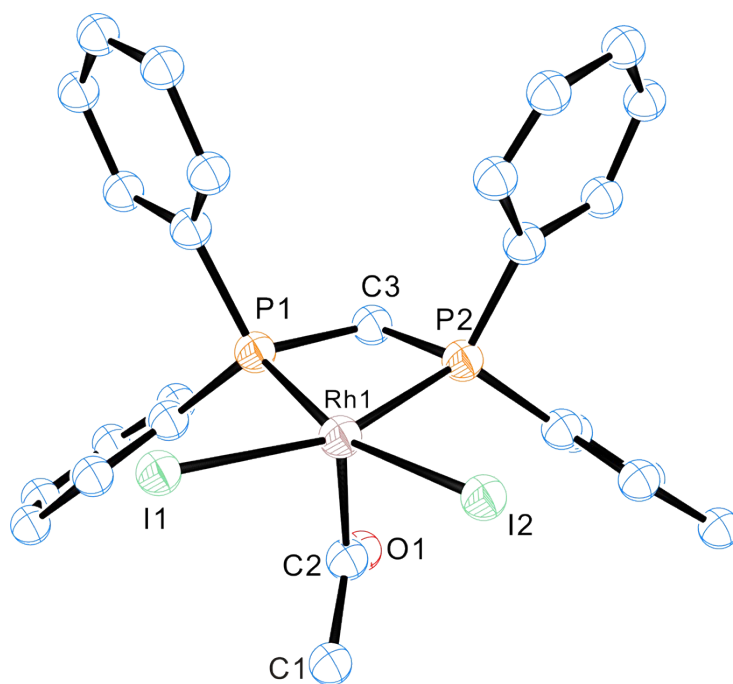

Fig. S2. Molecular structures of complex [Rh(COCH<sub>3</sub>)I<sub>2</sub>(dppm)].

## Characterizing Data

$[\text{Rh}_2(\mu\text{-I})(\mu\text{-CO})(\text{CO})_2(\text{dppm})_2]^+$  (Rh-dppm complex)  $^1\text{H}$  NMR (500MHz,  $\text{CDCl}_3$ ):  $\delta=4.37\text{-}4.52$  (m, 4H), 7.16 (s, 5H), 7.28-7.32 (m, 7H), 7.40-7.44 (m, 12H), 7.60-7.75 (m, 16H) ppm,  $^{31}\text{P}$  NMR (202.46MHz,  $\text{CDCl}_3$ ):  $\delta=27.68$  (d,  $J_{\text{Rh-P}}=94.55\text{Hz}$ , 4P) ppm.

$[\text{Rh}(\text{COCH}_3)_2(\text{dppe})]$  (Rh-dppe complex)  $^1\text{H}$  NMR (500MHz,  $\text{CDCl}_3$ ):  $\delta=2.15\text{-}2.28$  (m, 2H), 2.77(s, 3H), 3.08-3.21 (m, 2H), 7.30-7.34 (m, 4H), 7.41-7.48 (m, 6H), 7.50-7.53 (m, 6H), 7.84-7.88 (m, 4H) ppm.  $^{31}\text{P}$  NMR (202.46MHz,  $\text{CDCl}_3$ ):  $\delta=70.39$  (d,  $J_{\text{Rh-P}}=139.3\text{Hz}$ , 2P) ppm.

$[\text{Rh}(\text{COCH}_3)_2(\text{dppp})]$  (Rh-dppp complex).  $^1\text{H}$  NMR (500MHz,  $\text{CDCl}_3$ ):  $\delta=1.60\text{-}1.69$  (m, 1H), 2.42-2.50 (m, 3H), 3.06 (s, 3H), 3.08-3.17 (m, 2H), 7.24-7.26(m, 3H), 7.28-7.42 (m, 13H), 7.64-7.68(m, 4H) ppm.  $^{31}\text{P}$  NMR (202.46MHz,  $\text{CDCl}_3$ ):  $\delta=17.8$  (d,  $J_{\text{Rh-P}}=161.97\text{ Hz}$ , 2P) ppm.

$[\text{Rh}(\text{COCH}_3)_2(\text{dppb})]$  (Rh-dppb complex).  $^1\text{H}$  NMR (500MHz,  $\text{CDCl}_3$ ):  $\delta=1.12$  (s, 2H), 1.58 (s, 2H), 2.41-2.47 (m, 2H), 2.73 (s, 3H), 3.24-3.32 (m, 2H), 7.31-7.34(m, 4H), 7.36-7.39(m, 6H), 7.46-7.54 (m, 6H), 7.66-7.70(t, 4H) ppm.  $^{31}\text{P}$  NMR (202.46MHz,  $\text{CDCl}_3$ ):  $\delta=31.96$  (d,  $J_{\text{Rh-P}}=139.3\text{ Hz}$ , 2P) ppm.

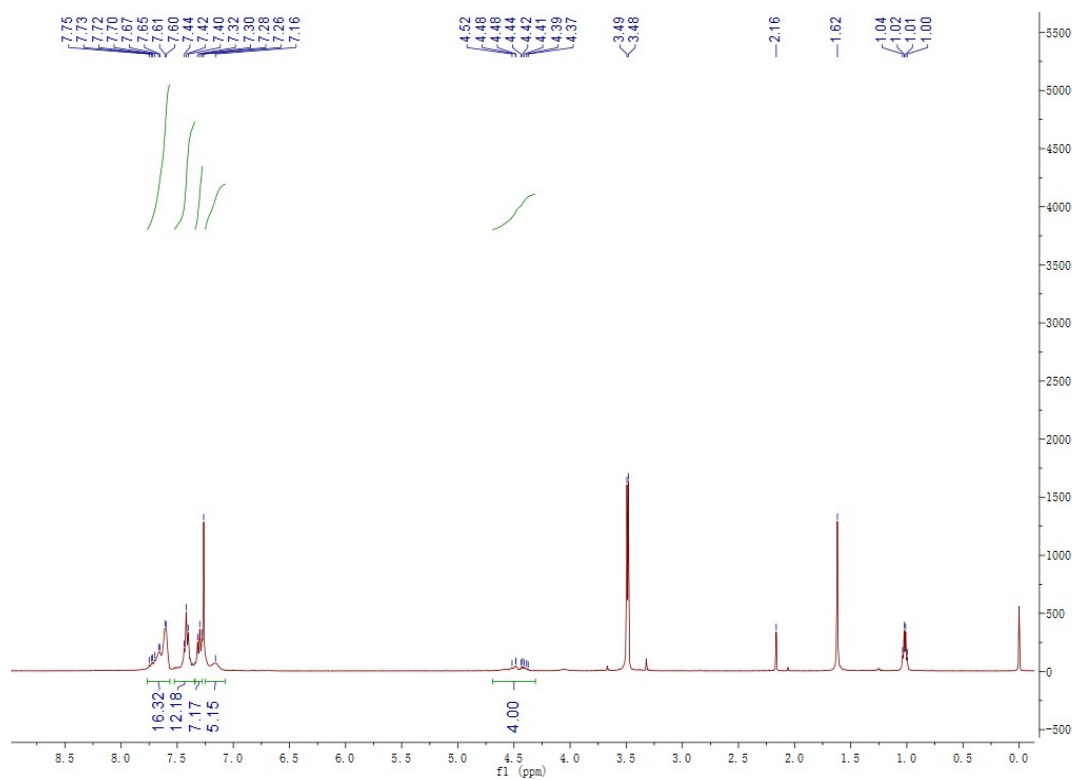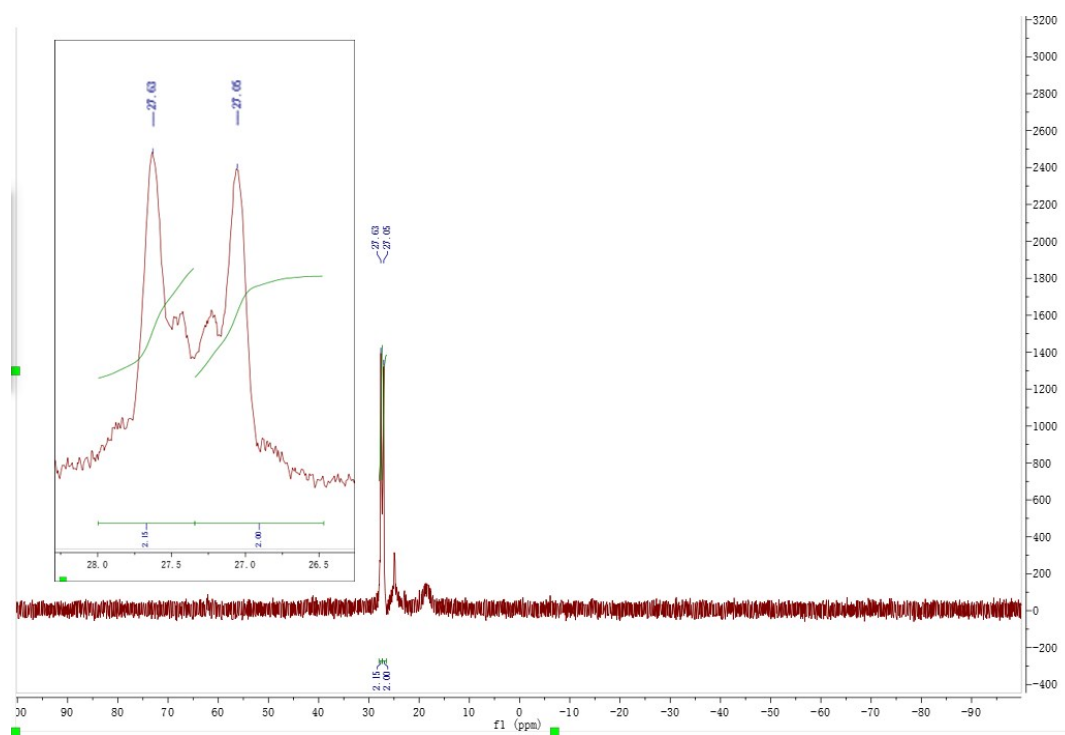

Fig. S3  $^1\text{H}$  and  $^{31}\text{P}$  NMR spectra of  $[\text{Rh}_2(\mu\text{-I})(\mu\text{-CO})(\text{CO})_2(\text{dppm})_2]^+$ .

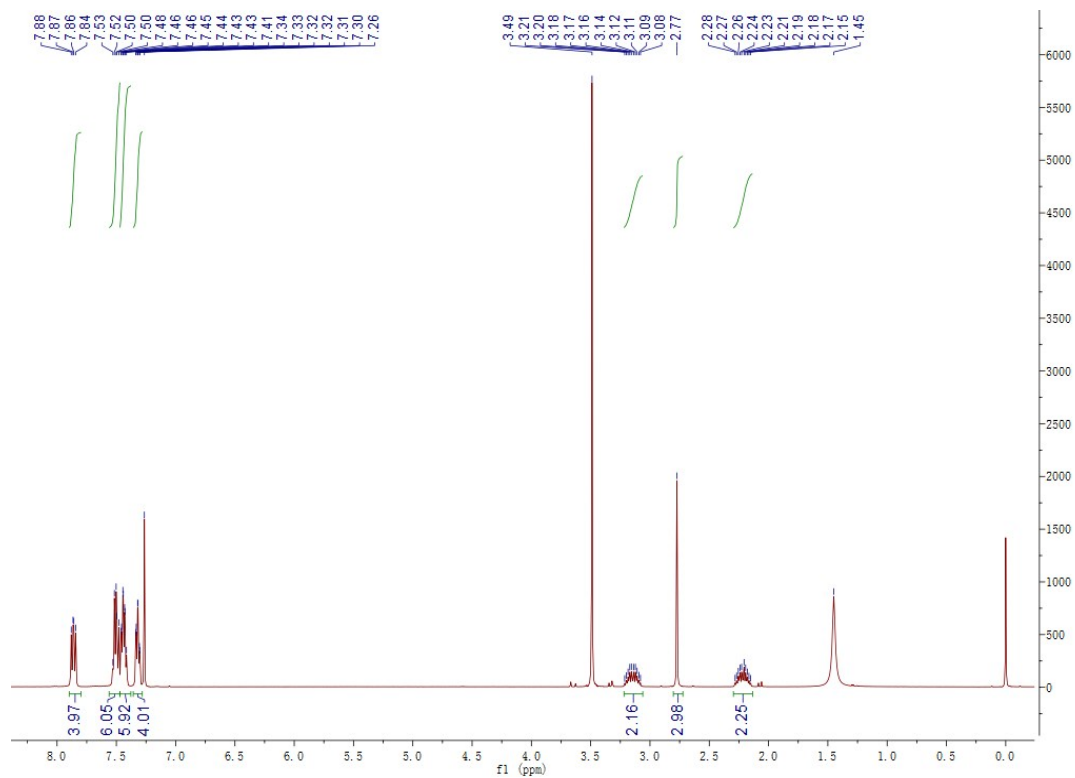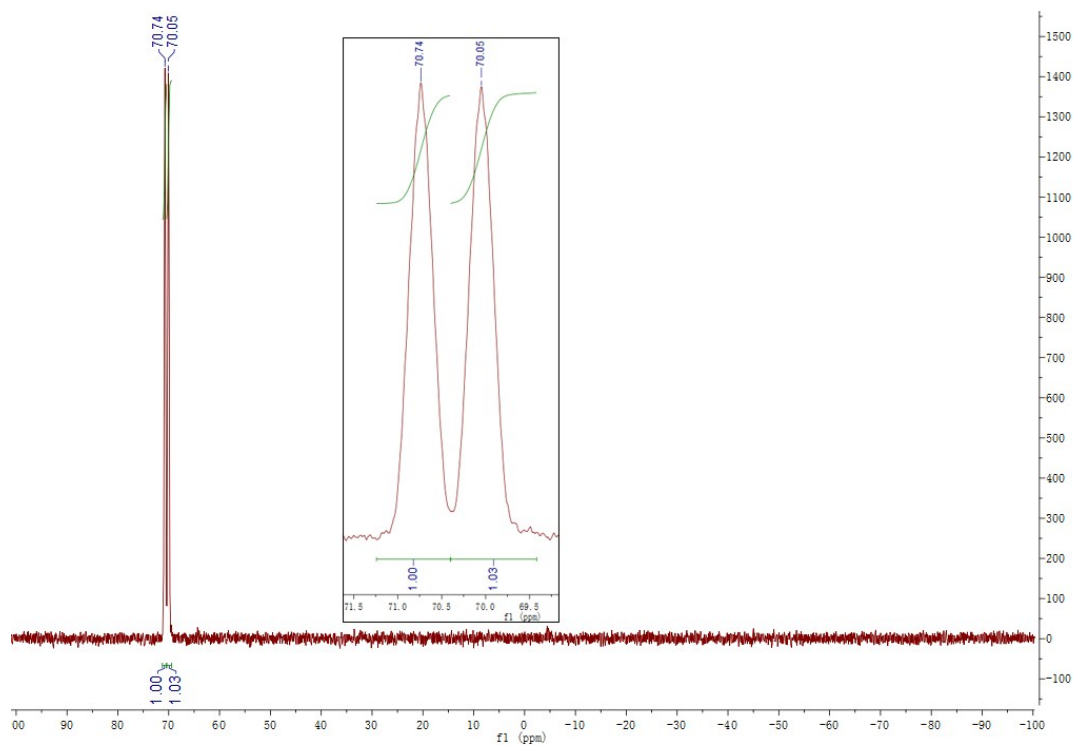

Fig. S4 <sup>1</sup>H and <sup>31</sup>P NMR spectra of [Rh(COCH<sub>3</sub>)<sub>2</sub>(dppe)].



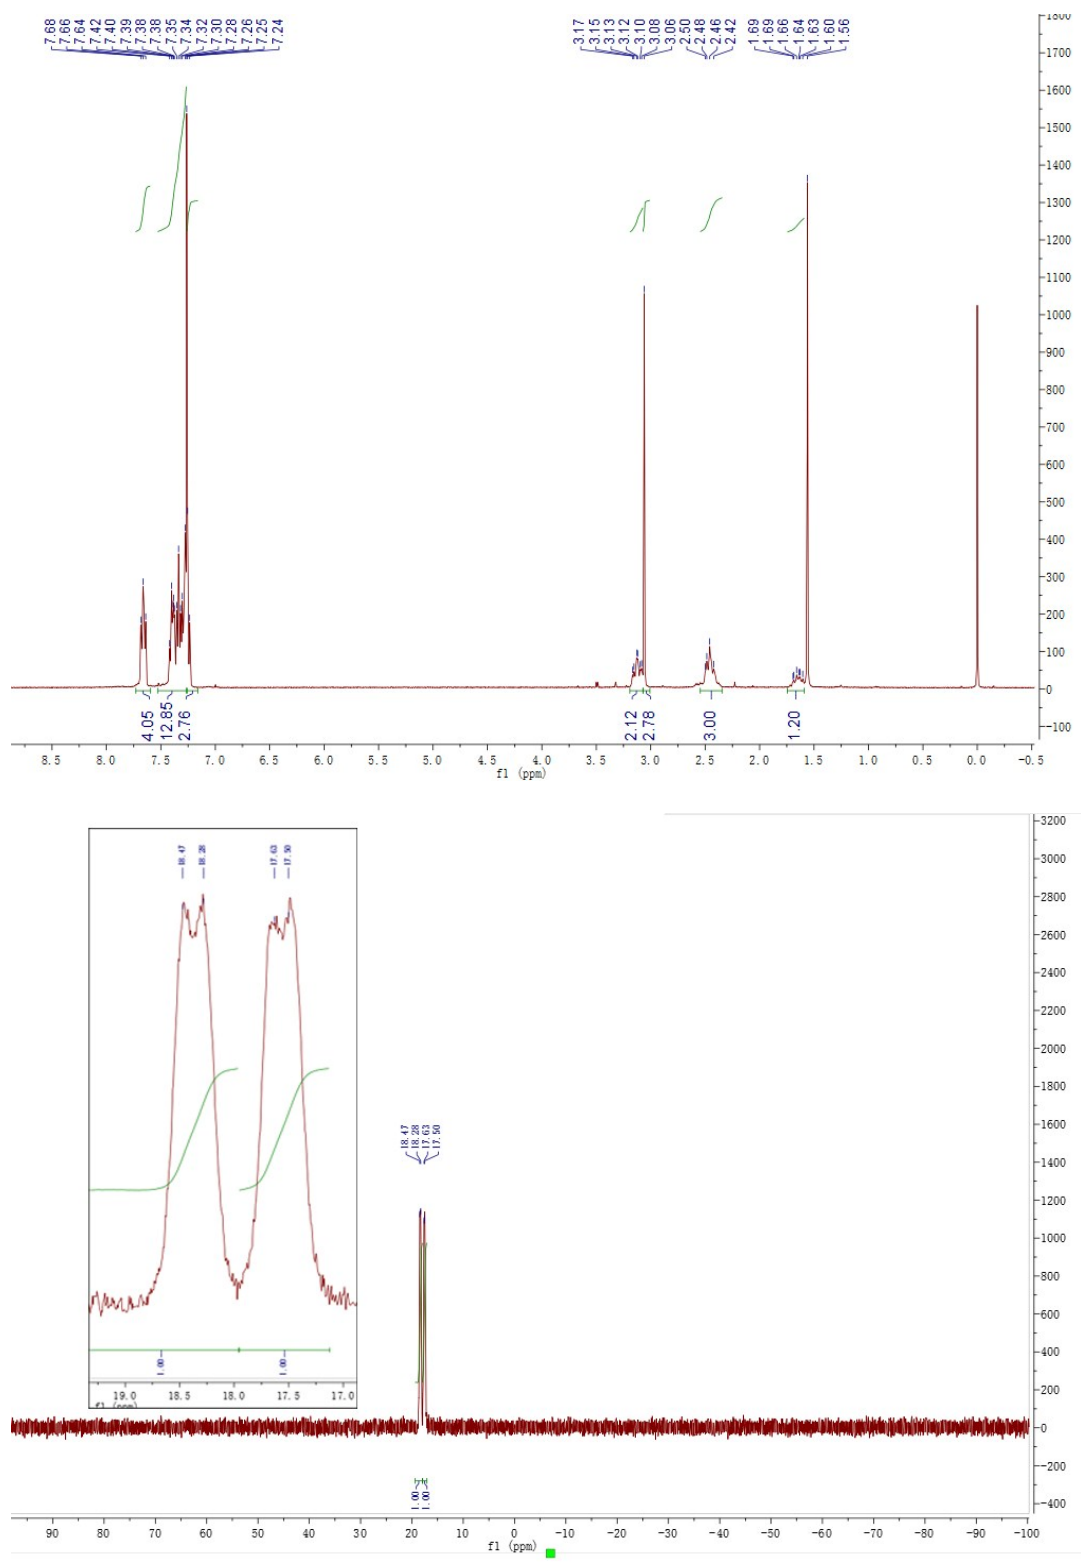

Fig. S5  $^1\text{H}$  and  $^{31}\text{P}$  NMR spectra of  $[\text{Rh}(\text{COCH}_3)_2(\text{dpp})]$ .

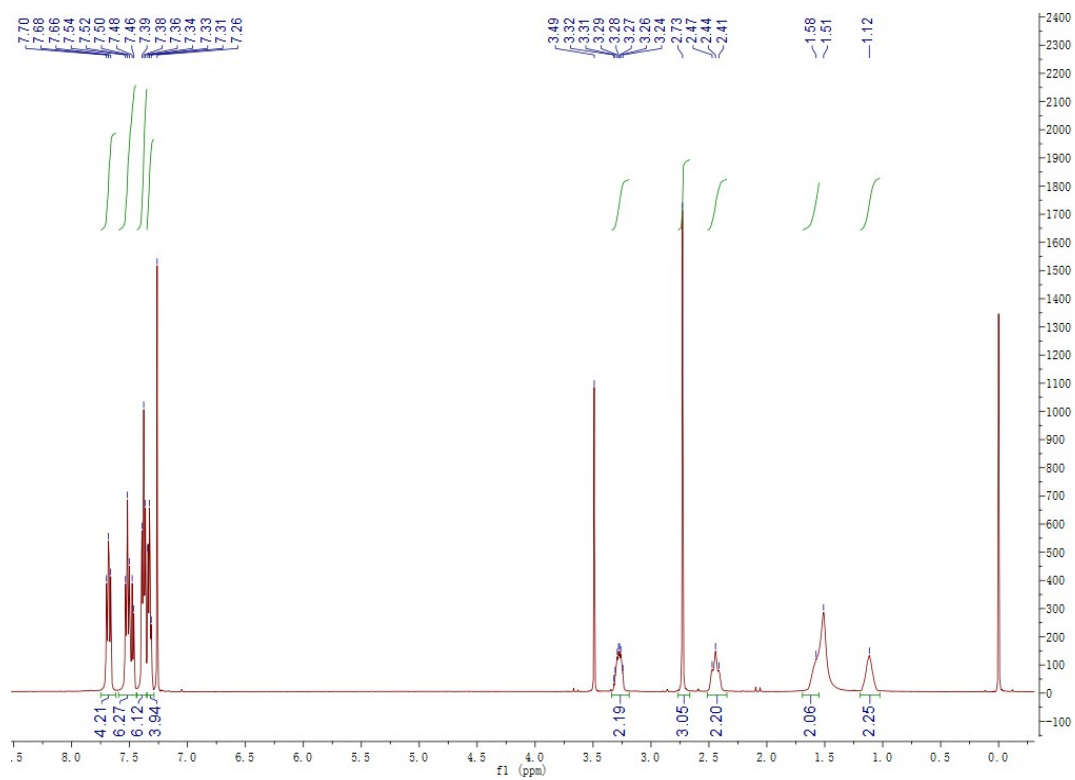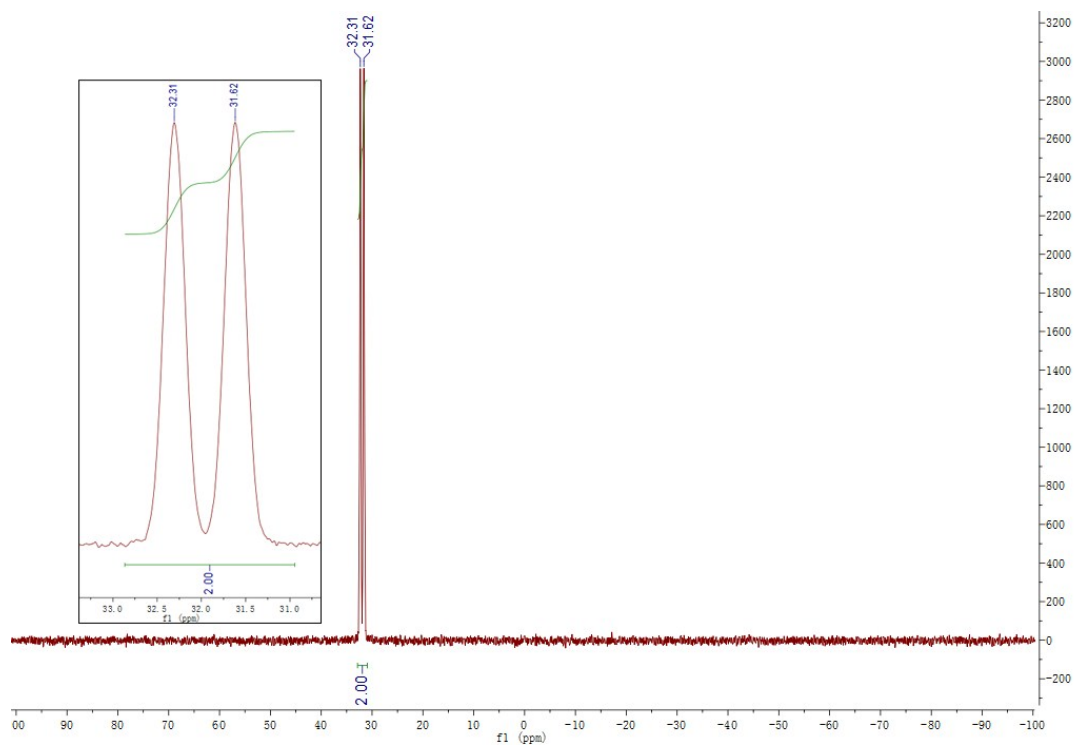

Fig. S6 <sup>1</sup>H and <sup>31</sup>P NMR spectra of [Rh(COCH<sub>3</sub>)<sub>2</sub>(dppb)].

## References

- [S1] G. S. Koermer and W. E. Slinkard, *Ind. Eng. Chem. Prod. Res. Dev.*, 1978, **17**, 231.
- [S2] N. Isogai and K. Tanaka, *J. Organomet. Chem.*, 1990, **397**, 101.
- [S3] P. B. Francois and F. C. Thyron, *Ind. Eng. Chem. Prod. Res. Dev.*, 1983, **22**, 542.
- [S4] M. Röper, H. Loevenich and J. Korff, *J. Mol. Catal.*, 1982, **17**, 315.
- [S5] G. Doyle, *J. Mol. Catal.*, 1983, **18**, 251.
- [S6] B. D. Panthi, S. L. Gipson and A. Franken, *Inorg. Chim. Acta*, 2015, **425**, 176.
- [S7] K. G. Moloy and J. L. Petersen, *Organomet.*, 1995, **14**, 2931.
- [S8] M. Fakley and R. Head, *Appl. Catal.*, 1983, **5**, 3.
